# Supplementary material
Source: PubMed Central journal article supplement (PMC11018365)
Supplement: NIHMS1981579-supplement-Supplemental.pdf [file NIHMS1981579-supplement-Supplemental.pdf]

## **SUPPLEMENTARY DATA**

**Supplementary Figure 1a.** Temporal co-expression of 59 known human nephrotic syndrome genes in sc-mRNA expression data of human fetal kidney cells.

**Supplementary Figure 1b.** Intersection of 59 known human nephrotic syndrome genes with the highest expressed genes in NPCa-d according to Hochane's sc-mRNA database [6].

**Supplementary Figure 2.** Sc-mRNA expression data for four genes known to cause monogenic isolated CAKUT in humans (*EYA1*, *SIX1*, *SIX2*, and *ITGA8*) in 17 developmental kidney cell types based on Lindström et al.

**Supplementary Table 1.** 40 genes known to cause human isolated CAKUT, if mutated.

**Supplementary Table 2.** 100 highest expressed genes in NPCa-d according to Hochane et al.

**Supplementary Table 3.** 59 genes known to cause human nephrotic syndrome, if mutated.

**Supplementary Table 4.** Clinical features and molecular details of families with variants in genes with high expression in NPC.

## SUPPLEMENTARY FIGURE LEGENDS

### **Supplementary Figure 1a: Temporal co-expression of 59 known human nephrotic syndrome genes in sc-mRNA expression data of human fetal kidney cells.**

15 of 59 genes known to cause human nephrotic syndrome show temporal co-expression in podocytes (Pod). Each of the rows corresponds to the expression data of one gene and each column from left to right corresponds to one specific cell type in their order from early to late development of the kidney. The order of genes is arranged in a way that a maximum of genes shows consecutive co-expression in a maximum of timepoints. The importance of podocytes in the development of nephrotic syndrome is shown by the high expression of 15 genes in podocytes and 8 genes in s-shaped body podocyte precursor cells. Evaluation of sc-RNA expression data shows that the known nephrotic syndrome genes arrange in a spatial clustering in distinct cell types rather than a temporal clustering in consecutive cell types like shown for known CAKUT genes in Figure 1.

The expression data and developmental order of cell types are based on sc-mRNA sequencing data of week 16 human fetal kidney cells by Hochane et al [6].

Glossary: sc-mRNA, single cell mRNA; NPCa-d, nephron progenitor cells a-d; PTA, pretubular aggregate; RVCSBa-b, renal vesicle/comma-shaped body a-b; SSB m/d, pr, pod, S-shaped body medial/distal, proximal precursor cells, podocyte precursor cells; CnT, connecting tubule; DTLH, distal tubule/loop of Henle; ErPrT, early proximal tubule; Pod, podocyte; UBCD, ureteric bud/collecting duct; IPC, interstitial progenitor cells; ICa-b, interstitial cells a-b; Mes, mesangial cells; End, endothelial cells.

**Supplementary Figure 1b: Intersection of 59 known human genes for nephrotic syndrome with the highest expressed genes in NPCa-d according to Hochane's sc-mRNA database [6].**

As a negative control (NC) we intersected 59 known human genes for nephrotic syndrome with the 100 highest expressed genes in nephron progenitor cells a-d (NPCa-d). There is no intersection between the 100 highest expressed genes in NPCa-d and the 59 genes known to cause nephrotic syndrome.

Glossary: WES, whole exome sequencing; sc-mRNA, single cell mRNA; NPCa-d, nephron progenitor cell type a-d.

**Supplementary Figure 2: Sc-mRNA expression data for four genes known to cause monogenic isolated CAKUT in humans (*EYA1*, *SIX1*, *SIX2*, and *ITGA8*) in 17 developmental kidney cell types based on Lindström et al.**

Lindström et al. performed single-cell sequencing of the human fetal kidney with subsequent pseudotime analysis of the nephrogenic niche at gestational week 17 [19]. They provide a graphical display of gene expression in 17 developmental cell types. A) *EYA1*, B) *SIX1*, C) *SIX2*, and D) *ITGA8* show high expression in nephron progenitor cells (NPC) of the Lindström database.

**Supplementary Table 1. 40 genes known to cause human isolated CAKUT, if mutated**

MOI, mode of inheritance; AR, autosomal recessive; AD, autosomal dominant; XL, X-linked

| <b>Gene</b>   | <b>Protein</b>                                                          | <b>MOI</b> | <b>Reference</b>                                                               |
|---------------|-------------------------------------------------------------------------|------------|--------------------------------------------------------------------------------|
| <b>ACE</b>    | Angiotensin I-converting enzyme                                         | AR         | Gribouval <i>Nat Genet</i> 37:964, 2005                                        |
| <b>AGT</b>    | Angiotensinogen                                                         | AR         | Gribouval <i>Nat Genet</i> 37:964, 2005                                        |
| <b>AGTR1</b>  | Angiotensin II receptor, type 1                                         | AR         | Gribouval <i>Nat Genet</i> 37:964, 2005                                        |
| <b>CHRM3</b>  | Muscarinic acetylcholine receptor M3                                    | AR         | Weber <i>AJHG</i> 19:634, 2011                                                 |
| <b>ETV4</b>   | ETS translocation variant 4, E1A enhancer binding protein               | AR         | Chen <i>IJPC</i> 4:61, 2016                                                    |
| <b>FRAS1</b>  | Extracellular matrix protein FRAS1                                      | AR         | Kohl <i>JASN</i> 25:1917, 2014                                                 |
| <b>FREM1</b>  | FRAS1 related extracellular matrix protein 1                            | AR         | Kohl <i>JASN</i> 25:1917, 2014                                                 |
| <b>FREM2</b>  | FRAS1 related extracellular matrix protein 2                            | AR         | Kohl <i>JASN</i> 25:1917, 2014                                                 |
| <b>GRIP1</b>  | Glutamate receptor interacting protein 1                                | AR         | Kohl <i>JASN</i> 25:1917, 2014                                                 |
| <b>HPSE2</b>  | Heparanase 2 (Inactive)                                                 | AR         | Bulum <i>Nephron</i> 130:54, 2015                                              |
| <b>ITGA8</b>  | Integrin $\alpha$ 8                                                     | AR         | Humbert <i>AJHG</i> 189:1260, 2014                                             |
| <b>REN</b>    | Renin                                                                   | AR         | Gribouval <i>Nat Genet</i> 37:964, 2005                                        |
| <b>TRAP1</b>  | Heat-shock protein 75 (also known as TNF receptor-associated protein 1) | AR         | Saisawat <i>KI</i> 85:880, 2014                                                |
| <b>FGF20</b>  | Fibroblast Growth Factor 20                                             | AR         | Barak <i>Dev Cell</i> 22:1191, 2012                                            |
| <b>BMP4</b>   | Bone morphogenic protein 4                                              | AD         | Weber <i>JASN</i> 19:891, 2008                                                 |
| <b>CHD1L</b>  | Chromodomain helicase DNA binding protein 1-like                        | AD         | Brockschmidt <i>NDT</i> 27:2355, 2012                                          |
| <b>CRKL</b>   | CRK Like Proto-Oncogene, adaptor protein                                | AD         | Lopez-Rivera <i>NEJM</i> 376:742, 2017                                         |
| <b>DSTYK</b>  | Dual serine/threonine and tyrosine protein kinase                       | AD         | Sanna-Cherchi <i>NEJM</i> 369:621, 2013                                        |
| <b>EYA1</b>   | Eyes absent homolog 1                                                   | AD         | Abdelhak <i>Nat Genet</i> 15:157, 1997                                         |
| <b>GATA3</b>  | GATA binding protein 3                                                  | AD         | Pandolfi <i>Nat Genet</i> 11:40, 1995;<br>Van Esch <i>Nature</i> 406:419, 2000 |
| <b>GREB1L</b> | Growth Regulation By Estrogen In Breast Cancer 1 Like                   | AD         | Brophy <i>Genetics</i> 207:215, 2017                                           |
| <b>HNF1B</b>  | HNF homeobox B                                                          | AD         | Lindner <i>Hum Mol Genet</i> 24:263, 1999                                      |
| <b>MUC1</b>   | Mucin 1                                                                 | AD         | Kirby <i>Nat Genet</i> 45:299, 2013                                            |
| <b>NRIP1</b>  | Nuclear Receptor Interacting Protein 1                                  | AD         | Vivante <i>JASN</i> 28:2364, 2017                                              |
| <b>PAX2</b>   | Paired box 2                                                            | AD         | Sanyanusin <i>Hum Mol Genet</i> 4:2183, 1995                                   |

|               |                                                                      |    |                                                                                                           |
|---------------|----------------------------------------------------------------------|----|-----------------------------------------------------------------------------------------------------------|
| <b>RET</b>    | Proto-oncogene tyrosine-protein kinase receptor Ret                  | AD | Skinner <i>AJHG</i> 82:344, 2008                                                                          |
| <b>ROBO2</b>  | Roundabout, axon guidance receptor, homolog 2 ( <i>Drosophila</i> )  | AD | Hwang <i>Hum Genet</i> 134:905, 2015; Lu <i>AJHG</i> 80:616, 2007                                         |
| <b>SALL1</b>  | Sal-like protein 1 (also known as spalt-like transcription factor 1) | AD | Kohlhase <i>Nat Genet</i> 18:81, 1998                                                                     |
| <b>SIX1</b>   | SIX homeobox 1                                                       | AD | Ruf <i>Proc Nat Acad Sci</i> 101: 8090, 2004                                                              |
| <b>SIX2</b>   | SIX homeobox 2                                                       | AD | Weber <i>JASN</i> 19:891, 2008                                                                            |
| <b>SIX5</b>   | SIX homeobox 5                                                       | AD | Hoskins <i>AJHG</i> 80:800, 2007                                                                          |
| <b>SLIT2</b>  | Slit homolog 2                                                       | AD | Hwang <i>Hum Genet</i> 134:905, 2015                                                                      |
| <b>SOX17</b>  | Transcription factor SIX-17                                          | AD | Gimelli <i>Hum Mut</i> 31:1352, 2010                                                                      |
| <b>SRGAP1</b> | SLIT-ROBO Rho GTPase activating protein 1                            | AD | Hwang <i>Hum Genet</i> 134:905, 2015                                                                      |
| <b>TBX18</b>  | T-Box transcription factor                                           | AD | Vivante <i>AJHG</i> 97:291, 2015                                                                          |
| <b>TNXB</b>   | Tenascin XB                                                          | AD | Gbadegesin <i>JASN</i> 24:1313, 2013                                                                      |
| <b>UMOD</b>   | Uromodulin                                                           | AD | Hart <i>JMG</i> 39:882, 2002                                                                              |
| <b>UPK3A</b>  | Uroplakin 3A                                                         | AD | Jenkins <i>JASN</i> 16:2141, 2005                                                                         |
| <b>WNT4</b>   | Protein Wnt-4                                                        | AD | Biason-Lauber <i>NEJM</i> 351:792, 2004; Mandel <i>AJHG</i> 82:39, 2008; Vivante <i>JASN</i> 24:550, 2013 |
| <b>KAL1</b>   | Anosmin 1                                                            | XL | Hardelin <i>PNAS</i> 89:8190, 1992                                                                        |

(modified from Van der Ven et al. (5))

**Supplementary Table 2. 100 highest expressed genes in Nephron Progenitor Cells a-d (NPC a-d) according to Hochane et al.**

NPCa-d, nephron progenitor cells a-d; *italics*, positive control: human CAKUT genes intersecting with the 100 highest expressed genes in NPCa-d; underlined, novel single/multiple CAKUT candidate genes intersecting with the 100 highest expressed genes in NPCa-d; **bold**, genes that overlap within NPCa-d

|    | NPCa         |         | NPCb          |         | NPCc           |         | NPCd          |         |
|----|--------------|---------|---------------|---------|----------------|---------|---------------|---------|
|    | Gene         | Z-Score | Gene          | Z-Score | Gene           | Z-Score | Gene          | Z-Score |
| 1  | <u>KIF19</u> | 4,3     | CA7           | 3,9     | MYLK2          | 3,7     | CCNA1         | 4,0     |
| 2  | CHRNA1       | 4,2     | HAS1          | 3,9     | UNC5B-AS1      | 2,9     | RP11-977B10.2 | 3,9     |
| 3  | BRICD5       | 4,1     | HRK           | 3,6     | PHKA1          | 2,9     | TAGLN3        | 3,7     |
| 4  | CCK          | 4,1     | EGR4          | 3,6     | <b>DNAH12</b>  | 2,8     | HIST1H3G      | 3,7     |
| 5  | ESPN         | 4,1     | HSPA6         | 3,5     | RP11-616M22.11 | 2,8     | HIST1H2AI     | 3,7     |
| 6  | OTOS         | 4,1     | MUC12         | 3,5     | ZNF385C        | 2,7     | PIF1          | 3,6     |
| 7  | NDST4        | 3,9     | RBM24         | 3,4     | DAPL1          | 2,7     | LINC01572     | 3,5     |
| 8  | PCDH15       | 3,8     | RP11-524C21.2 | 3,3     | <b>SYT14</b>   | 2,7     | AURKA         | 3,4     |
| 9  | LIM2         | 3,7     | MATN4         | 3,3     | <b>TMEM100</b> | 2,6     | ERCC6L        | 3,4     |
| 10 | RSPO3        | 3,7     | GBX2          | 3,2     | <b>WFIKKN1</b> | 2,6     | AC131097.4    | 3,4     |
| 11 | CHRND        | 3,6     | TCHH          | 3,2     | <b>MRAP2</b>   | 2,6     | AC093702.1    | 3,4     |
| 12 | SHD          | 3,6     | <b>SHISA8</b> | 3,1     | <b>CITED1</b>  | 2,6     | NEK2          | 3,4     |
| 13 | MYO15A       | 3,5     | REM2          | 3,0     | <b>DCC</b>     | 2,6     | SAPCD2        | 3,4     |
| 14 | FAT3         | 3,5     | ADRB2         | 3,0     | SPINK8         | 2,6     | ALG10         | 3,4     |
| 15 | TXLNB        | 3,4     | RCOR2         | 3,0     | <b>ELAVL4</b>  | 2,6     | COCH          | 3,4     |
| 16 | <b>SCX</b>   | 3,4     | <b>IL19</b>   | 2,9     | MEIS1-AS2      | 2,6     | CKAP2         | 3,3     |

|    |                      |     |               |     |                      |     |               |     |
|----|----------------------|-----|---------------|-----|----------------------|-----|---------------|-----|
| 17 | LRRC7                | 3,4 | <b>NGFR</b>   | 2,9 | <b>TMEM190</b>       | 2,5 | FAM57B        | 3,3 |
| 18 | BMPER                | 3,4 | LHFPL4        | 2,9 | <b>ECEL1</b>         | 2,5 | HIST1H1D      | 3,3 |
| 19 | <b>SLC15A1</b>       | 3,2 | <b>GPR157</b> | 2,8 | CRABP2               | 2,5 | ZNF732        | 3,3 |
| 20 | AKR1C1               | 3,2 | CDO1          | 2,8 | PCDHB5               | 2,5 | HIST1H2AH     | 3,3 |
| 21 | NRXN1                | 3,2 | <b>DDIT4L</b> | 2,8 | <b>SCG5</b>          | 2,5 | BORA          | 3,3 |
| 22 | <b>HAMP</b>          | 3,2 | GLB1L3        | 2,8 | AC012123.1           | 2,5 | ARHGAP33      | 3,3 |
| 23 | <b>MEOX1</b>         | 3,2 | DIRAS3        | 2,8 | <b>FAM78B</b>        | 2,5 | CDK5RAP2      | 3,3 |
| 24 | NBL1                 | 3,2 | OPRD1         | 2,8 | <b>RP11-757F18.5</b> | 2,4 | LA16c-306E5.2 | 3,3 |
| 25 | NPY                  | 3,1 | MIPOL1        | 2,7 | LINC00908            | 2,4 | FCMR          | 3,3 |
| 26 | DLEU7                | 3,1 | <b>SYT14</b>  | 2,7 | LRP8                 | 2,4 | TAF5          | 3,2 |
| 27 | MAEL                 | 3,1 | NNMT          | 2,7 | <b>SLC15A1</b>       | 2,4 | NUSAP1        | 3,2 |
| 28 | FAM84A               | 3,1 | NLRP1         | 2,7 | LINC00574            | 2,4 | CDC25C        | 3,2 |
| 29 | <b>NKAIN3</b>        | 3,0 | VWCE          | 2,7 | HOXC6                | 2,4 | ARHGAP11A     | 3,2 |
| 30 | CTD-2298J14.2        | 3,0 | <b>SHC4</b>   | 2,7 | <b>FGF10</b>         | 2,4 | CEP295        | 3,2 |
| 31 | <b>COLGALT2</b>      | 3,0 | <b>COL9A2</b> | 2,7 | <b>NGFR</b>          | 2,4 | FBXO43        | 3,2 |
| 32 | <b>ELAVL4</b>        | 2,9 | <b>GRIK4</b>  | 2,6 | <b>MEOX1</b>         | 2,4 | TRIM43        | 3,2 |
| 33 | OSR1                 | 2,9 | <b>BRINP1</b> | 2,6 | NSG1                 | 2,4 | KIF14         | 3,2 |
| 34 | <b>TMEM100</b>       | 2,9 | <b>FAM78B</b> | 2,6 | RP4-622L5.7          | 2,3 | PCBP3         | 3,2 |
| 35 | RP13-884E18.2        | 2,9 | B3GALNT2      | 2,6 | GPHA2                | 2,3 | RTN1          | 3,2 |
| 36 | <u>TRIM36</u>        | 2,9 | GPR3          | 2,6 | <b>ABCA5</b>         | 2,3 | CDC20         | 3,2 |
| 37 | <b>RP11-757F18.5</b> | 2,9 | <b>ADGRG2</b> | 2,6 | RP11-365O16.6        | 2,3 | RP11-345J4.5  | 3,2 |
| 38 | <b>FAIM2</b>         | 2,8 | AATK          | 2,6 | <b>EYA1</b>          | 2,3 | CENPA         | 3,2 |
| 39 | <b>LY6H</b>          | 2,8 | OSBPL6        | 2,6 | RP13-766D20.4        | 2,2 | CLGN          | 3,2 |



|    |                  |     |                |     |                  |     |              |     |
|----|------------------|-----|----------------|-----|------------------|-----|--------------|-----|
| 40 | <b>CITED1</b>    | 2,8 | <b>CACNG6</b>  | 2,5 | <b>PPP1R3G</b>   | 2,2 | PMEL         | 3,2 |
| 41 | SCHLAP1          | 2,8 | KCNN1          | 2,5 | <b>OBP2A</b>     | 2,2 | ATP2A1-AS1   | 3,2 |
| 42 | <b>UG0898H09</b> | 2,7 | ZFAND2A        | 2,5 | <b>DMRT3</b>     | 2,2 | SAP30        | 3,1 |
| 43 | MAP2             | 2,7 | POMK           | 2,5 | <b>PDZD7</b>     | 2,2 | TTC29        | 3,1 |
| 44 | <b>ATOH7</b>     | 2,7 | <b>TAC1</b>    | 2,5 | HOXC5            | 2,2 | CCNF         | 3,1 |
| 45 | DPP10            | 2,7 | GRM7           | 2,5 | SCN5A            | 2,2 | CENPF        | 3,1 |
| 46 | RSPO1            | 2,7 | LRRN3          | 2,5 | HAS2             | 2,2 | MCM10        | 3,1 |
| 47 | MMP23B           | 2,7 | RP4-800J21.3   | 2,4 | CORO6            | 2,2 | CBFB         | 3,1 |
| 48 | RP11-352M15.2    | 2,6 | NUDT11         | 2,4 | <b>LY6H</b>      | 2,2 | H1FX-AS1     | 3,1 |
| 49 | RHPN1            | 2,6 | MAPK8IP1       | 2,4 | SCUBE1           | 2,2 | RP11-452L6.7 | 3,1 |
| 50 | HMCN1            | 2,6 | KCNF1          | 2,4 | CDH7             | 2,1 | RTKN2        | 3,1 |
| 51 | LINC00475        | 2,6 | DNAJB1         | 2,4 | C22orf31         | 2,1 | CTC-209H22.3 | 3,1 |
| 52 | CTD-2147F2.1     | 2,6 | <b>WFIKKN1</b> | 2,4 | <b>FAM107A</b>   | 2,1 | FBXO48       | 3,1 |
| 53 | LINC00923        | 2,6 | PPP1R27        | 2,4 | <b>CACNG6</b>    | 2,1 | KNSTRN       | 3,1 |
| 54 | <b>MRAP2</b>     | 2,5 | TRIM46         | 2,4 | HAS2-AS1         | 2,1 | CENPQ        | 3,1 |
| 55 | <b>NPTX2</b>     | 2,5 | ARL4D          | 2,4 | <b>UG0898H09</b> | 2,1 | FAM122B      | 3,1 |
| 56 | <b>GABBR2</b>    | 2,5 | ZDHHC11B       | 2,3 | GDNF-AS1         | 2,1 | CENPW        | 3,1 |
| 57 | <b>TRDN</b>      | 2,5 | TCEAL7         | 2,3 | <b>SHISA8</b>    | 2,1 | PHF19        | 3,1 |
| 58 | TNNC2            | 2,5 | NPPC           | 2,3 | <b>FAIM2</b>     | 2,1 | GTSE1        | 3,1 |
| 59 | ARPP21           | 2,4 | RFX4           | 2,3 | AFF2             | 2,1 | <u>USP35</u> | 3,1 |
| 60 | <b>DNAH12</b>    | 2,4 | <b>TRDN</b>    | 2,3 | <b>NKAIN3</b>    | 2,1 | RACGAP1      | 3,1 |
| 61 | <b>WASF3</b>     | 2,4 | COL2A1         | 2,3 | NNAT             | 2,1 | HIST1H3C     | 3,1 |
| 62 | AC003092.1       | 2,4 | <b>LRRTM2</b>  | 2,3 | CHST1            | 2,1 | HIST1H4F     | 3,1 |

|    |                |     |                |     |                |     |               |     |
|----|----------------|-----|----------------|-----|----------------|-----|---------------|-----|
| 63 | <b>PDZD7</b>   | 2,4 | TRABD2B        | 2,3 | <b>ATOH7</b>   | 2,1 | TROAP         | 3,0 |
| 64 | ST8SIA4        | 2,3 | <b>ADPRHL1</b> | 2,3 | <b>TRDN</b>    | 2,1 | OIP5          | 3,0 |
| 65 | <b>SCG5</b>    | 2,3 | PRTG           | 2,2 | ST8SIA2        | 2,1 | CEP97         | 3,0 |
| 66 | RP11-1152H14.1 | 2,3 | PLPPR3         | 2,2 | ZFR2           | 2,0 | HIST1H2BL     | 3,0 |
| 67 | VSTM2B         | 2,3 | PLEKHF1        | 2,2 | <b>IL19</b>    | 2,0 | ADGB          | 3,0 |
| 68 | LBX2           | 2,3 | RP11-20I23.6   | 2,2 | <i>GREB1L</i>  | 2,0 | IQGAP3        | 3,0 |
| 69 | <b>ADPRHL1</b> | 2,3 | LINC01376      | 2,2 | <b>ADGRG2</b>  | 2,0 | ORC6          | 3,0 |
| 70 | CNTNAP2        | 2,3 | EGR3           | 2,2 | HOXC8          | 2,0 | LAG3          | 3,0 |
| 71 | <b>ECEL1</b>   | 2,2 | PTCHD1         | 2,2 | <i>SIX2</i>    | 2,0 | RP11-481J2.3  | 3,0 |
| 72 | SHISA3         | 2,2 | CYP51A1        | 2,1 | CCDC3          | 2,0 | EME1          | 3,0 |
| 73 | RP11-74J13.8   | 2,2 | <b>DCC</b>     | 2,1 | RP11-357H14.17 | 2,0 | ZNF829        | 3,0 |
| 74 | CNTN5          | 2,2 | <b>HTR1F</b>   | 2,1 | <b>REEP2</b>   | 2,0 | TRAIP         | 3,0 |
| 75 | PCBP4          | 2,2 | HPCA           | 2,1 | FGF8           | 2,0 | <b>GPR157</b> | 3,0 |
| 76 | SOBP           | 2,2 | <b>NPTX2</b>   | 2,1 | SIL1           | 2,0 | FZR1          | 3,0 |
| 77 | KCNH8          | 2,2 | ZNF460         | 2,1 | PRKAR1A        | 2,0 | UBE2C         | 3,0 |
| 78 | CCDC154        | 2,1 | SIX4           | 2,1 | <i>SIX1</i>    | 1,9 | <b>CHTF18</b> | 3,0 |
| 79 | PODNL1         | 2,1 | <b>DMRT3</b>   | 2,1 | <b>C1QTNF4</b> | 1,9 | PPM1E         | 3,0 |
| 80 | SNTG2          | 2,1 | KLK8           | 2,1 | KCNC2          | 1,9 | HYLS1         | 3,0 |
| 81 | AKR1C2         | 2,1 | HSPA1A         | 2,1 | PFN3           | 1,9 | CCNB1         | 3,0 |
| 82 | PDGFC          | 2,1 | ENOX1          | 2,1 | SULT1A2        | 1,9 | RP11-469N6.1  | 3,0 |
| 83 | <b>GRIK4</b>   | 2,1 | <b>TMEM190</b> | 2,1 | LINC00887      | 1,9 | HJURP         | 3,0 |
| 84 | FAM213A        | 2,1 | ARC            | 2,1 | STAT4          | 1,9 | MEIOB         | 3,0 |

|     |                |     |                |     |                 |     |              |     |
|-----|----------------|-----|----------------|-----|-----------------|-----|--------------|-----|
| 85  | <b>FAM107A</b> | 2,1 | SLC25A21       | 2,0 | IGDCC3          | 1,9 | REEP4        | 3,0 |
| 86  | <b>ABCA5</b>   | 2,1 | <b>OBP2A</b>   | 2,0 | CA14            | 1,9 | FBXO10       | 3,0 |
| 87  | <b>DDIT4L</b>  | 2,1 | SH3RF3-AS1     | 2,0 | GNG3            | 1,9 | DLGAP5       | 3,0 |
| 88  | <b>PPP1R3G</b> | 2,1 | RGS2           | 2,0 | <b>LRRTM2</b>   | 1,9 | ARL6IP1      | 3,0 |
| 89  | GFRA1          | 2,1 | RP11-1102P16.1 | 2,0 | <b>WASF3</b>    | 1,9 | CTB-193M12.5 | 3,0 |
| 90  | KIAA0226L      | 2,1 | DENND5B        | 2,0 | <b>COLGALT2</b> | 1,9 | CCNB2        | 2,9 |
| 91  | <b>EYA1</b>    | 2,1 | <b>GABBR2</b>  | 2,0 | KCNK12          | 1,9 | FAM24B       | 2,9 |
| 92  | RGS17          | 2,0 | CTD-2034I4.2   | 2,0 | <b>TAC1</b>     | 1,9 | HMGB2        | 2,9 |
| 93  | DKFZP434L187   | 2,0 | RP11-236L14.2  | 2,0 | YY2             | 1,9 | FAM64A       | 2,9 |
| 94  | <b>REEP2</b>   | 2,0 | <b>C1QTNF4</b> | 2,0 | <b>COL9A2</b>   | 1,8 | POLQ         | 2,9 |
| 95  | RGMA           | 2,0 | FAM216A        | 2,0 | <b>SCX</b>      | 1,8 | CNIH2        | 2,9 |
| 96  | MCF2L-AS1      | 2,0 | KIF1A          | 2,0 | AC108142.1      | 1,8 | HIST1H4B     | 2,9 |
| 97  | <b>BRINP1</b>  | 2,0 | ZNRF3-AS1      | 1,9 | ZMAT4           | 1,8 | TTK          | 2,9 |
| 98  | <b>FGF10</b>   | 2,0 | LINC00683      | 1,9 | <b>HTR1F</b>    | 1,8 | ZNF610       | 2,9 |
| 99  | LRFN5          | 2,0 | TVP23A         | 1,9 | <b>SHC4</b>     | 1,8 | AC078941.1   | 2,9 |
| 100 | NALCN          | 1,9 | TNFRSF18       | 1,9 | <b>HAMP</b>     | 1,8 | CDCA2        | 2,9 |

**Supplementary Table 3. 59 genes known to cause human nephrotic syndrome, if mutated.**

MOI, mode of inheritance; AR, autosomal recessive; AD, autosomal dominant; XL, X-linked

| <b>Gene</b>    | <b>Protein</b>                                                       | <b>MOI</b> | <b>Reference</b>                             |
|----------------|----------------------------------------------------------------------|------------|----------------------------------------------|
| <b>ADCK4</b>   | AarF domain containing kinase 4                                      | AR         | Ashraf <i>J Clin Invest</i> 123:5179, 2013   |
| <b>ALG1</b>    | ALG1, Chitobiosyldiphosphodolichol Beta-Mannosyltransferase          | AR         | Harshman <i>Pediatr Int</i> 58:785, 2016     |
| <b>APOA1</b>   | Apolipoprotein A-1                                                   | AR         | Nichols <i>Genomics</i> 8:318, 1990          |
| <b>ARHGDI1</b> | Rho GDP dissociation inhibitor (GDI) alpha                           | AR         | Gee <i>J Clin Invest</i> 123:3243, 2013      |
| <b>AVIL</b>    | Advillin                                                             | AR         | Rao <i>J Clin Invest</i> 127:4257, 2017      |
| <b>CD2AP</b>   | CD2 associated protein                                               | AR         | Kim <i>Science</i> 300:1298, 2003            |
| <b>COQ2</b>    | Coenzyme Q2 4-hydroxybenzoate polyprenyltransferase                  | AR         | Diomedi-Camassei <i>JASN</i> 18:2773, 2007   |
| <b>COQ6</b>    | Coenzyme Q6 monooxygenase                                            | AR         | Heeringa <i>J Clin Invest</i> 121:2013, 2011 |
| <b>CUBN</b>    | Cubilin (intrinsic factor-cobalamin receptor)                        | AR         | Ovunc <i>JASN</i> 22:1815, 2011              |
| <b>CRB2</b>    | Crumbs, Drosophila, Homolog of 2                                     | AR         | Ebarasi <i>AJHG</i> 96: 153-161, 2015        |
| <b>DGKE</b>    | Diacylglycerol kinase epsilon                                        | AR         | Lemaire <i>Nat Genet</i> 45: 531, 2013       |
| <b>EMP2</b>    | Epithelial membrane protein 2                                        | AR         | Gee <i>AJHG</i> 94:884, 2014                 |
| <b>FAT1</b>    | Fat tumor suppressor, drosophila, homolog of, 1                      | AR         | Gee <i>Nat Commun</i> 7:10822, 2016          |
| <b>ITGA3</b>   | Integrin, alpha 3 (antigen CD49C, alpha 3 subunit of VLA-3 receptor) | AR         | Yalcin <i>Hum Mol Genet</i> 24:3679, 2015    |
| <b>ITGB4</b>   | Integrin, beta 4                                                     | AR         | Kambham <i>AJKD</i> 36:190, 2000             |
| <b>KANK1</b>   | KN motif and ankyrin repeat domain-containing protein 1              | AR         | Gee <i>J Clin Invest</i> 125:2375, 2015      |
| <b>KANK2</b>   | KN motif and ankyrin repeat domain-containing protein 2              | AR         | Gee <i>J Clin Invest</i> 125:2375, 2015      |
| <b>KANK4</b>   | KN motif and ankyrin repeat domain-containing protein 3              | AR         | Gee <i>J Clin Invest</i> 125:2375, 2015      |
| <b>LAGE3</b>   | L antigen family member 3                                            | AR         | Braun <i>Nat Genet</i> 49:1529, 2017         |
| <b>LAMB2</b>   | Laminin, beta 2                                                      | AR         | Zenker <i>Hum Mol Genet</i> 12:2625, 2004    |
| <b>LCAT</b>    | Lecithin-Cholesterol Acyltransferase                                 | AR         | Taramelli <i>Hum Genet</i> 85:195, 1990      |

|                 |                                                                                                |    |                                                      |
|-----------------|------------------------------------------------------------------------------------------------|----|------------------------------------------------------|
| <b>MAGI2</b>    | Membrane-associated guanylate kinase, WW and PDZ domains-containing 2                          | AR | Bierzynska <i>JASN</i> 28:1614, 2017                 |
| <b>MYO1E</b>    | Homo sapiens myosin IE (MYO1E)                                                                 | AR | Mele <i>NEJM</i> 365:295, 2011                       |
| <b>NEU1</b>     | Neuraminidase 1                                                                                | AR | Mütze <i>Genet Metab Rep</i> 10:1-4, 2016            |
| <b>NPHS1</b>    | Nephrin                                                                                        | AR | Kestila <i>Mol Cell</i> 1:575, 1998                  |
| <b>NPHS2</b>    | Podocin                                                                                        | AR | Boute <i>Nat Genet</i> 24:349, 2000                  |
| <b>NUP107</b>   | Nucleoporin, 107-KD                                                                            | AR | Miyake <i>AJHG</i> 97:555, 2015                      |
| <b>NUP133</b>   | Nucleoporin 133-KD                                                                             | AR | Braun <i>Nat Gene</i> 48:457, 2016                   |
| <b>NUP205</b>   | Nucleoporin, 205-KD                                                                            | AR | Braun <i>Nat Genet</i> 48:457, 2016                  |
| <b>NUP85</b>    | Nucleoporin 85-KD                                                                              | AR | Braun <i>Nat Gene</i> 48:457, 2016                   |
| <b>NUP93</b>    | Nucleoporin, 93-KD                                                                             | AR | Braun <i>Nat Genet</i> 48:457, 2016                  |
| <b>OSGEP</b>    | O-sialoglycoprotein endopeptidase                                                              | AR | Braun <i>Nat Genet</i> 49:1529, 2017                 |
| <b>PDSS2</b>    | Prenyl (decaprenyl) diphosphate synthase, subunit 2                                            | AR | Lopez <i>AJHG</i> 79:1125, 2006                      |
| <b>PLCE1</b>    | Phospholipase C, epsilon 1                                                                     | AR | Hinkes <i>Nat Genet</i> 38:1397, 2006                |
| <b>PTPRO</b>    | Protein tyrosine phosphatase, receptor type, O                                                 | AR | Ozaltin <i>AJHG</i> 89:139, 2011                     |
| <b>SCARB2</b>   | Scavenger receptor class B, member 2                                                           | AR | Badhwar <i>Brain</i> 127: 2173, 2004                 |
| <b>SGPL1</b>    | Sphingosine 1 phosphate lyase 1                                                                | AR | Lovric <i>J Clin Invest</i> 127: 912, 2017           |
| <b>SMARCA1</b>  | SWI/SNF related, matrix associated, actin dependent regulator of chromatin, subfamily a-like 1 | AR | Boerkoel <i>Nat Genet</i> 30:215, 2002               |
| <b>TP53RK</b>   | TP53-regulating kinase                                                                         | AR | Braun <i>Nat Genet</i> 49:1529, 2017                 |
| <b>TPRKB</b>    | TP53RK binding protein                                                                         | AR | Braun <i>Nat Genet</i> 49:1529, 2017                 |
| <b>TTR</b>      | Transthyretin                                                                                  | AR | Ando <i>Biochem Biophys Res Commun</i> 211:354, 1995 |
| <b>VPS33B</b>   | VPS33B, Late Endosome And Lysosome Associated                                                  | AR | Bull <i>J Pediatr</i> 148:269, 2006                  |
| <b>WDR73</b>    | WD repeat-containing protein 73                                                                | AR | Colin <i>AJHG</i> 95:637, 2014                       |
| <b>XPO5</b>     | Exportin 5                                                                                     | AR | Braun <i>Nat Genet</i> 48:457, 2016                  |
| <b>ACTN4</b>    | Actinin, alpha 4                                                                               | AD | Kaplan <i>Nat Genet</i> 24(3):251, 2000              |
| <b>ANLN</b>     | Actin-binding protein anillin                                                                  | AD | Gbadegesin <i>JASN</i> 25:1991, 2014                 |
| <b>ARHGAP24</b> | Rho GTPase activating protein 24                                                               | AD | Akilesh <i>J Clin Invest</i> 121:4127, 2011          |
| <b>*INF2</b>    | Inverted formin, FH2 and WH2 domain containing                                                 | AD | Brown <i>Nat Genet</i> 42:72, 2010                   |
| <b>LMX1B</b>    | LIM Homeobox Transcription Factor 1 Beta                                                       | AD | Dreyer <i>Nat Genet</i> 19:47 1998                   |

|               |                                                                                                  |         |                                                   |
|---------------|--------------------------------------------------------------------------------------------------|---------|---------------------------------------------------|
| <b>MYH9</b>   | Myosin heavy chain 9, nonmuscle                                                                  | AD      | Heath <i>AJHG</i> 69:1033, 2001                   |
| <b>PODXL</b>  | Podocalyxin                                                                                      | AD      | Barua <i>Kidney Int</i> 85:124, 2014              |
| <b>TRPC6</b>  | Transient receptor potential cation channel, subfamily C, member 6                               | AD      | Winn <i>Science</i> 308:1801, 2005                |
| <b>WT1</b>    | Wilms Tumor 1                                                                                    | AD      | Melo <i>J Clin Endocrinol Metab</i> 87:2500, 2002 |
| <b>IKBKAP</b> | Inhibitor of kappa light polypeptide gene enhancer in B cells, kinase complex associated protein | AR/AD   | Anderson <i>AJHG</i> 68:753, 2001                 |
| <b>NXF5</b>   | Nuclear RNA export factor 5                                                                      | XL      | Esposito <i>Hum Mol Genet</i> 22:3654, 2013       |
| <b>APOE</b>   | Apolipoprotein E                                                                                 | XL      | Oikawa <i>JASN</i> 8:820, 1997                    |
| <b>APOL1</b>  | Apolipoprotein L-1                                                                               | Unknown | Parsa <i>NEJM</i> 369:2183, 2013                  |
| <b>GPC5</b>   | Glypican 5                                                                                       | Unknown | Okamoto <i>Nat Genet</i> 43:459, 2011             |
| <b>SYNPO</b>  | Synaptopodin                                                                                     | Unknown | Bierzynska <i>Kidney Int</i> 91:937, 2017         |

(modified from Connaughton et al. (8))

**Supplementary Table 4. Clinical features and molecular details of CAKUT families with variants in genes with high expression in Nephron Progenitor Cells (NPC).**

A) Homozygous mutation in *KIF19* in individual (B2730-21) with CAKUT

B) Homozygous mutation in *TRIM36* in individual (A3761-21) with CAKUT

C) Compound heterozygous mutation in *USP35* in individual (A4671-21) with CAKUT

D) Homozygous mutation in *CHTF18* in individual (A1808-21) with CAKUT

Polyphen 2: Polymorphism phenotyping v2 (<http://genetics.bwh.harvard.edu/pph2/>);

SIFT: Sorting Intolerant from Tolerant algorithm (<https://sift.bii.a-star.edu.sg/>); EVS:

Exome Variant Server (<https://evs.gs.washington.edu/EVS/>)

**A) Homozygous mutation in *KIF19* in individual (B2730-21) with CAKUT**

|                          |                         |                                           |
|--------------------------|-------------------------|-------------------------------------------|
| <b>Family-Individual</b> |                         | <b>B2730-21</b>                           |
| Ethnic Origin            |                         | Saudi-Arab                                |
| Sex                      |                         | Female                                    |
| CAKUT phenotype          |                         | bilateral VUR                             |
| Gene                     |                         | <i>KIF19</i>                              |
| Nucleotide Change        |                         | c.664G>A                                  |
| Amino Acid Change        |                         | p.Ala222Thr                               |
| Conservation             |                         | Partially conserved to <i>Danio rerio</i> |
| Zygoty                   |                         | Homozygous                                |
| Population Frequency     | gnomAD allele frequency | 0.002395                                  |
|                          | EVS                     | Not reported                              |
| Prediction Scores        | Polyphen 2              | Deleterious (0.99)                        |
|                          | Mutation Taster         | Deleterious                               |
|                          | SIFT Score              | Disease Causing                           |
|                          | CADD Score              | 29.2                                      |



**B) Homozygous mutation in *TRIM36* in individual (A3761-21) with CAKUT**

|                          |                         |                                                                       |
|--------------------------|-------------------------|-----------------------------------------------------------------------|
| <b>Family-Individual</b> |                         | <b>A3761-21</b>                                                       |
| Ethnic Origin            |                         | Indian Subcontinent                                                   |
| Sex                      |                         | Male                                                                  |
| CAKUT phenotype          |                         | Right: dysplastic kidney with VUR,<br>Left: kidney rotational anomaly |
| Gene                     |                         | <i>TRIM36</i>                                                         |
| Nucleotide Change        |                         | c.361G>C                                                              |
| Amino Acid Change        |                         | p.Asp121His                                                           |
| Conservation             |                         | Conserved to <i>Danio rerio</i>                                       |
| Zygoty                   |                         | Homozygous                                                            |
| Population Frequency     | gnomAD allele frequency | 0.00002392                                                            |
|                          | EVS                     | Not reported                                                          |
| Prediction Scores        | Polyphen 2              | Benign (0.69)                                                         |
|                          | Mutation Taster         | Tolerated                                                             |
|                          | SIFT Score              | Disease Causing                                                       |
|                          | CADD Score              | 23.0                                                                  |

**C) Compound heterozygous mutation in *USP35* in individual (A4671-21) with CAKUT**

|                          |                         |                                                                    |
|--------------------------|-------------------------|--------------------------------------------------------------------|
| <b>Family-Individual</b> |                         | <b>A4671-21</b>                                                    |
| Ethnic Origin            |                         | Albanian                                                           |
| Sex                      |                         | Male                                                               |
| CAKUT phenotype          |                         | Right: cystic dysplastic kidney, urachus remnant                   |
| Gene                     |                         | <i>USP35</i>                                                       |
| Nucleotide Change        |                         | c.103C>T; c.1711G>T                                                |
| Amino Acid Change        |                         | p.Arg35Cys; p.Gly571*                                              |
| Conservation             |                         | Conserved to <i>Mus musculus</i> ; conserved to <i>Danio rerio</i> |
| Zygoty                   |                         | compound heterozygous                                              |
| Population Frequency     | gnomAD allele frequency | Not reported; 0.00004009                                           |
|                          | EVS                     | Not reported; not reported                                         |
| Prediction Scores        | Polyphen 2              | Benign (0.45); stop gain                                           |
|                          | Mutation Taster         | Deleterious; stop gain                                             |
|                          | SIFT Score              | Disease Causing; stop gain                                         |
|                          | CADD Score              | 26.0; 54.0                                                         |

**D) Homozygous mutation in *CHTF18* in individual (A1808-21) with CAKUT**

|                          |                         |                                        |
|--------------------------|-------------------------|----------------------------------------|
| <b>Family-Individual</b> |                         | <b>A1808-21</b>                        |
| Ethnic Origin            |                         | Arabic                                 |
| Sex                      |                         | Male                                   |
| CAKUT phenotype          |                         | Left: renal agenesis                   |
| Gene                     |                         | <i>CHTF18</i>                          |
| Nucleotide Change        |                         | c.2564G>A                              |
| Amino Acid Change        |                         | p.Arg855Gln                            |
| Conservation             |                         | Conserved to <i>Ciona intestinalis</i> |
| Zygoty                   |                         | Homozygous                             |
| Population Frequency     | gnomAD allele frequency | 0.0002028                              |
|                          | EVS                     | 0/7/4112                               |
| Prediction Scores        | Polyphen 2              | Deleterious (0.91)                     |
|                          | Mutation Taster         | Tolerated                              |
|                          | SIFT Score              | Disease Causing                        |
|                          | CADD Score              | 33.0                                   |
